# Supplementary material
Source: PubMed Central journal article supplement (PMC2765525)
Supplement: NIHMS95842-supplement-1_si_001.pdf [file NIHMS95842-supplement-1_si_001.pdf]

**Supplementary Figure S1. Spin labeled p53(13-61)**

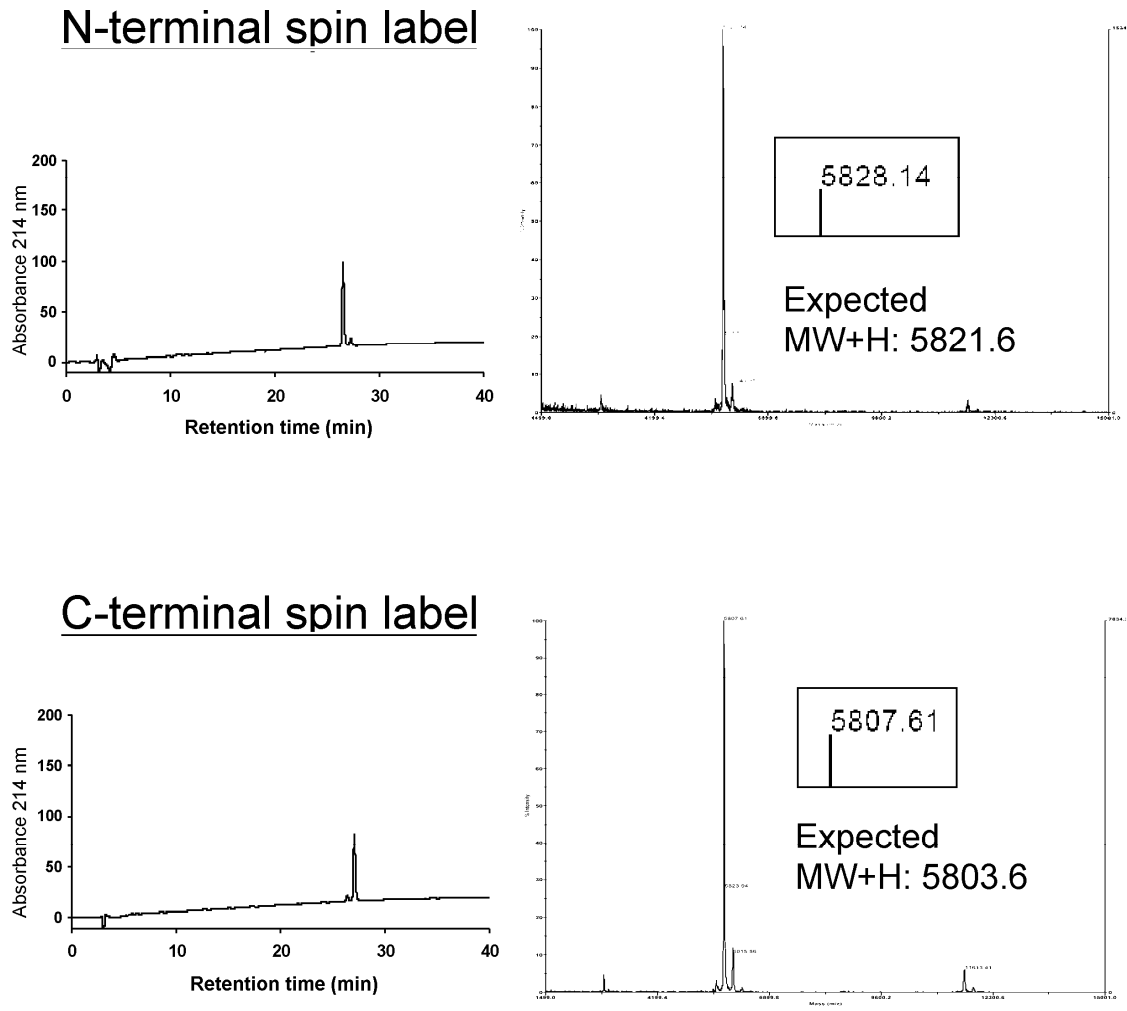

**Supplementary Fig. S1. HPLC traces and mass spectra establishing the integrity of the spin labeled p53(13-61).** (Top) Analytical reversed phase HPLC (left) and MALDI-TOF mass spectrum (right) of purified N-terminal spin labeled p53(13-61). (Bottom) Analytical reversed phase HPLC (left) and MALDI-TOF mass spectrum (right) of purified C-terminal spin labeled p53(13-61). The calculated mass (5821.6 for N-terminal spin labeled p53(13-61) and 5803.6 for C-terminal spin labeled p53(13-61)) matched the observed mass within error ranges.

## Supplementary Figure S2. Spin labeled p53(13-57)pT18pS20

### N-terminal spin label

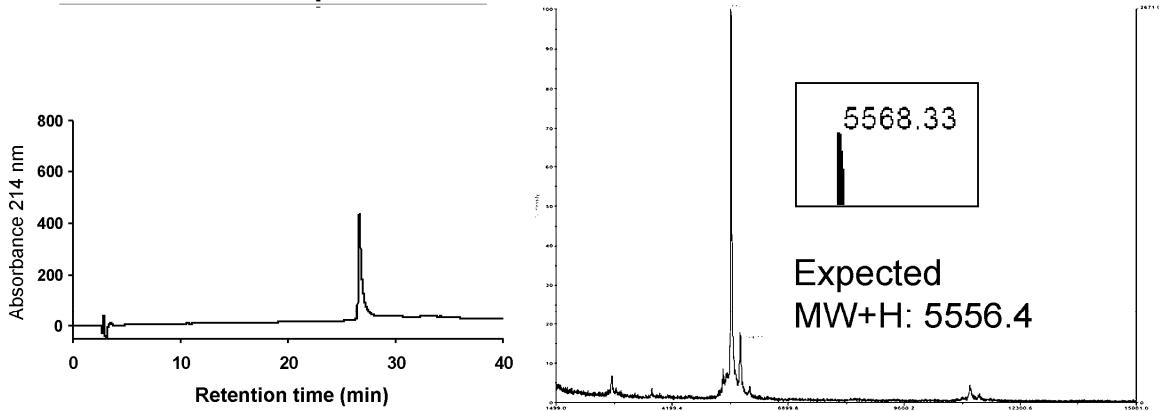

### C-terminal spin label

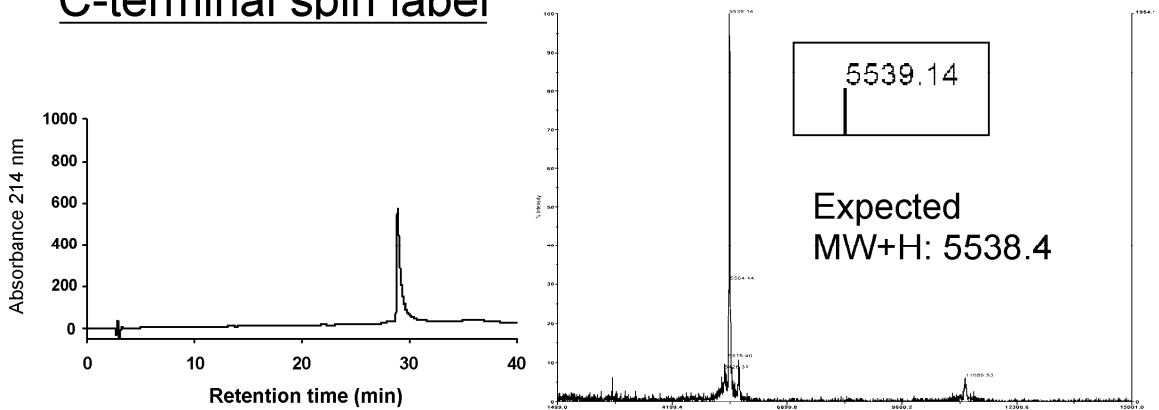

**Supplementary Fig. S2 HPLC traces and mass spectra establishing the integrity of the spin labeled p53(13-57)pT18pS20.** (Top) Analytical reversed phase HPLC (left) and MALDI-TOF mass spectrum (right) of purified N-terminal spin labeled p53(13-57)pT18pS20. (Bottom) Analytical reversed phase HPLC (left) and MALDI-TOF mass spectrum (right) of purified C-terminal spin labeled p53(13-57)pT18pS20. The calculated mass (5556.4 for N-terminal spin labeled p53(13-57)pT18pS20 and 5538.4 for C-terminal spin labeled p53(13-57)pT18pS20) matched the observed mass within error ranges.

### Supplementary Figure S3. Interaction of MTSL with KIX

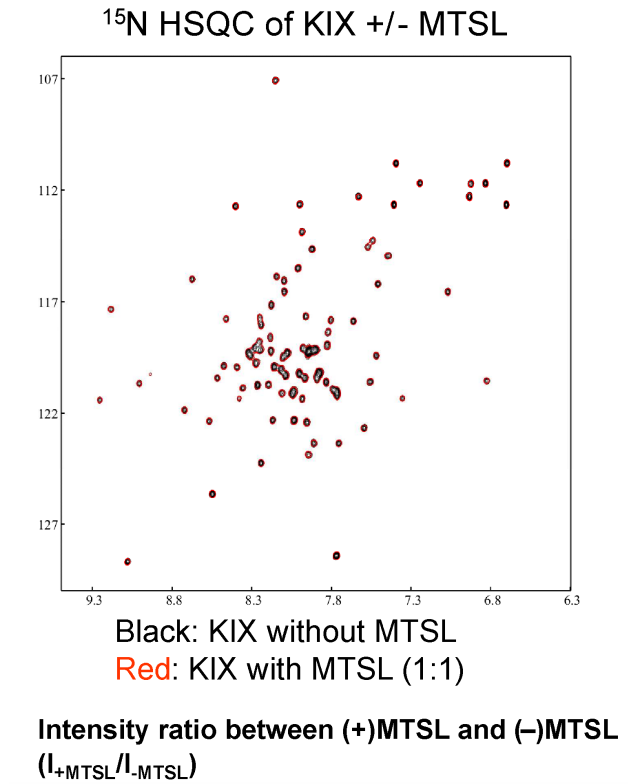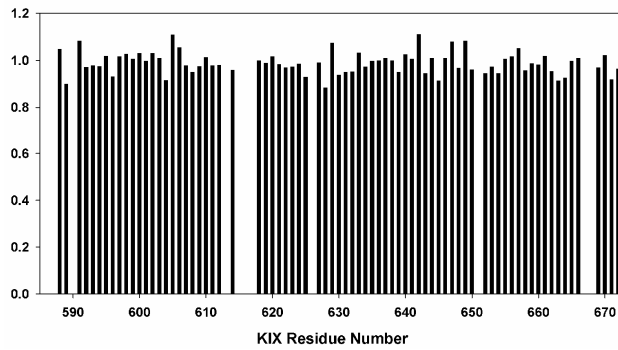

**Supplementary Fig. S3 Control experiments showing that free MTSL spin label does not broaden KIX resonances.** (Top) <sup>1</sup>H-<sup>15</sup>N HSQC spectra of <sup>15</sup>N-KIX free (black) and in the presence of MTSL (1:1) (red). (Bottom) Histogram showing the experimental intensity ratios between with and without MTSL ( $I = I_{+MTSL}/I_{-MTSL}$ ) for each residue with an adequately resolved cross peak in the <sup>1</sup>H-<sup>15</sup>N HSQC spectrum of <sup>15</sup>N KIX.

**Supplementary Figure S4. NMR titrations of KIX and p53**

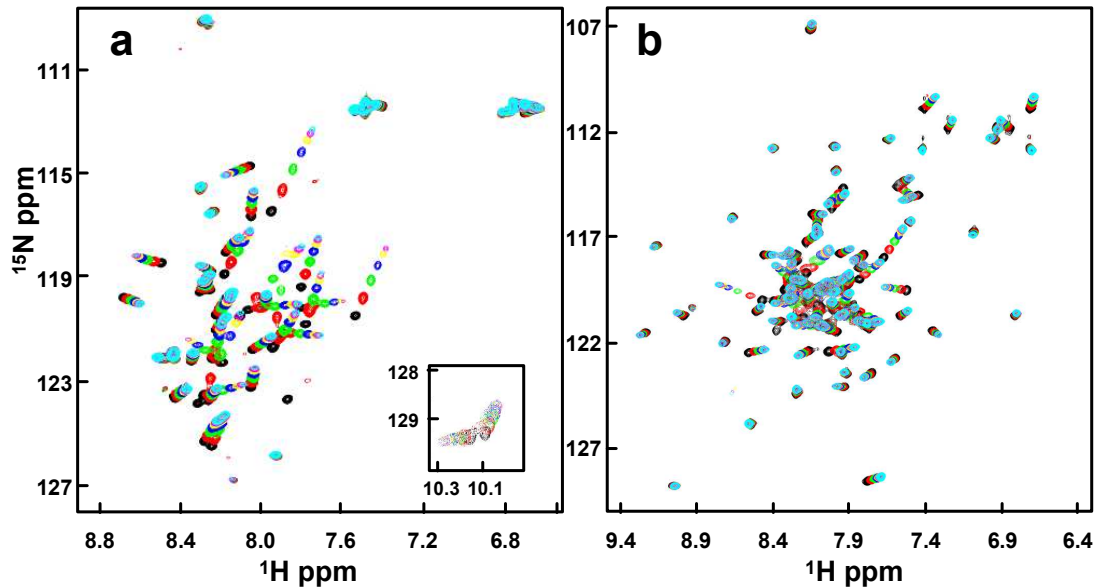

**Supplementary Figure S4.**  $^1\text{H}$ - $^{15}\text{N}$  HSQC spectra of p53(13-61) and KIX. a. Titration of  $^{15}\text{N}$ -p53(13-61) with unlabeled KIX. Superposition of seven spectra at relative ratios of p53(13-61):KIX of 1:0 (*black*), 1:0.25 (*red*), 1:0.5 (*green*), 1:0.75 (*blue*), 1:1 (*yellow*), 1:1.25 (*magenta*) and 1:1.5 (*cyan*). Peaks from the two tryptophan side-chains are shown in the inset spectrum. b. Titration of  $^{15}\text{N}$ -KIX with unlabeled p53(13-61). Superposition of seven spectra at relative ratios of KIX:p53(13-61) of 1:0 (*black*), 1:0.25 (*red*), 1:0.5 (*green*), 1:0.75 (*blue*), 1:1 (*yellow*), 1:1.25 (*magenta*) and 1:1.5 (*cyan*).

## Supplementary Figure S5. Competition Experiments

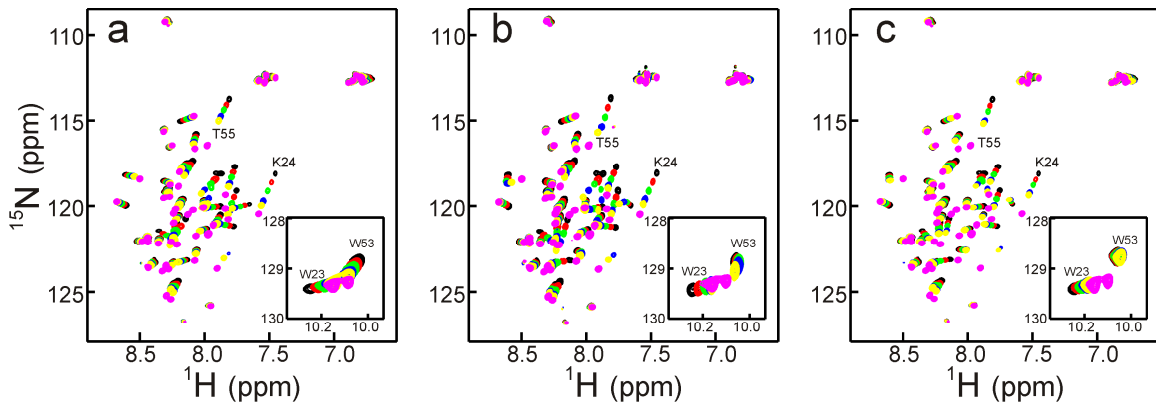

**Supplementary Figure S5.** Competition experiments between p53(13-61), MLL, and c-Myb or pKID. a. Titration of  $^{15}\text{N}$ -p53(13-61) bound to KIX (1:1 ratio) with unlabeled MLL. Superposition of six spectra at relative ratios of p53(13-61):KIX:MLL of 1:1:0 (*black*), 1:1:0.25 (*red*), 1:1:0.5 (*green*), 1:1:1 (*blue*), 1:1:2 (*yellow*), and 1:0:0 (*magenta*). Peaks from two tryptophan side-chains are shown in the inset spectrum. b. Titration of  $^{15}\text{N}$ -p53(13-61) bound to KIX (1:1 ratio) with unlabeled c-Myb. Superposition of six spectra at relative ratios of p53(13-61):KIX:c-Myb of 1:1:0 (*black*), 1:1:0.25 (*red*), 1:1:0.5 (*green*), 1:1:1 (*blue*), 1:1:2 (*yellow*), and 1:0:0 (*magenta*). Peaks from two tryptophan side-chains are shown in the inset spectrum. c. Titration of  $^{15}\text{N}$ -p53(13-61) bound to KIX (1:1 ratio) with unlabeled pKID. Superposition of six spectra at relative ratios of p53(13-61):KIX: pKID of 1:1:0 (*black*), 1:1:0.25 (*red*), 1:1:0.5 (*green*), 1:1:1 (*blue*), 1:1:2 (*yellow*), and 1:0:0 (*magenta*). Peaks from two tryptophan side-chains are shown in the inset spectrum.

### Supplementary Figure S6. Relationship between Kds

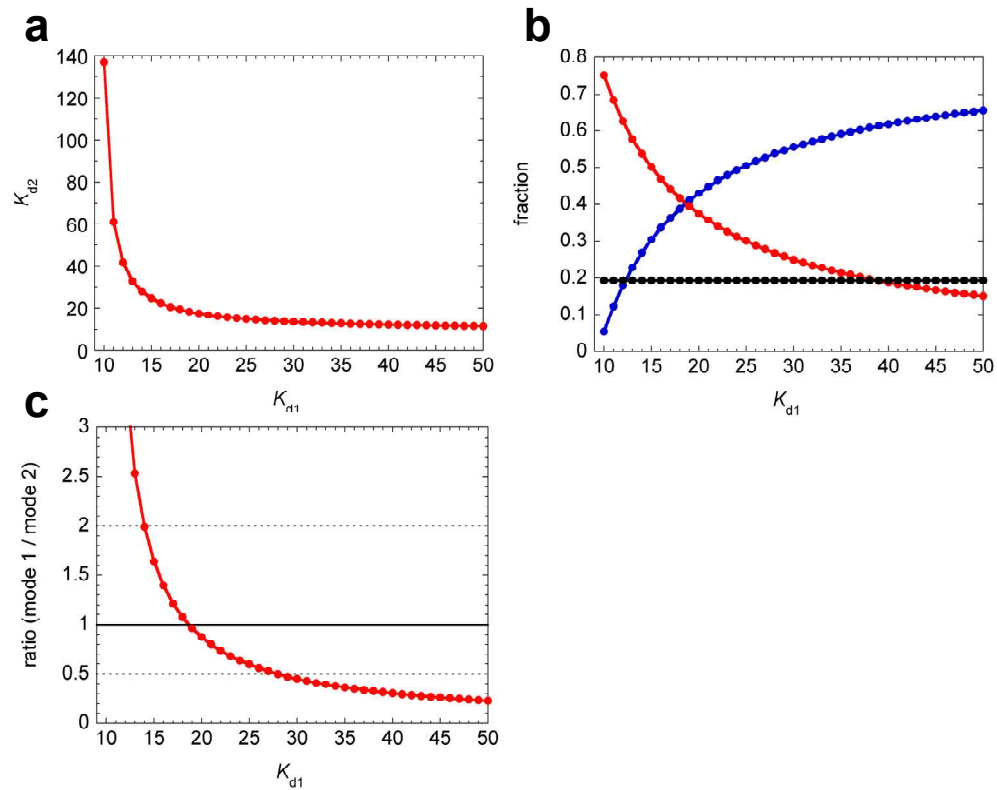

**Supplementary Figure S6.** a. Relationship between  $K_{d1}$  and  $K_{d2}$  under the restriction of  $K_d = K_{d1} K_{d2} / (K_{d1} + K_{d2}) = 9.32 \mu\text{M}$ . b. Changes in the population of the two binding modes depending on the  $K_{d1}$  value with the restriction of  $K_d = 9.32 \mu\text{M}$ . Red, blue, and black lines show the populations of binding mode 1, binding mode 2, and the free form of KIX. Concentrations of KIX and full-length p53 TAD were fixed at  $200 \mu\text{M}$ . c. The ratio of the populations of the two binding modes.

**Supplementary Figure S7. Chemical shift changes of KIX upon addition of p53**

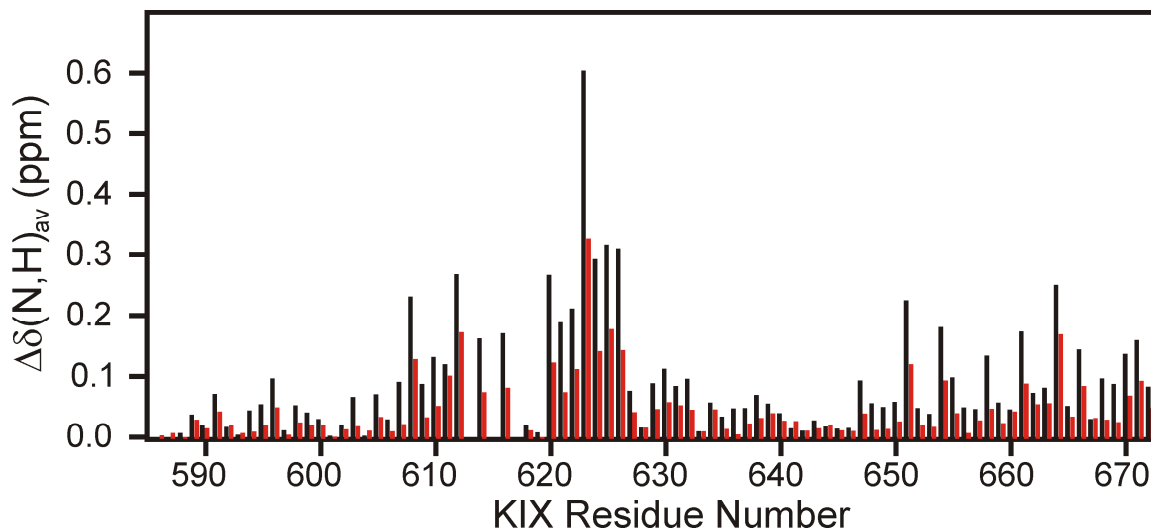

**Supplementary Figure S7.** Histogram showing weighted average chemical shift changes for KIX between free KIX and a 1:1 complex of p53(13-61) (black bar) and a 1:1 complex of a mixture of p53(14-28) and p53(38-61) (red).

### Supplementary Figure S8. HSQC Titration Curves

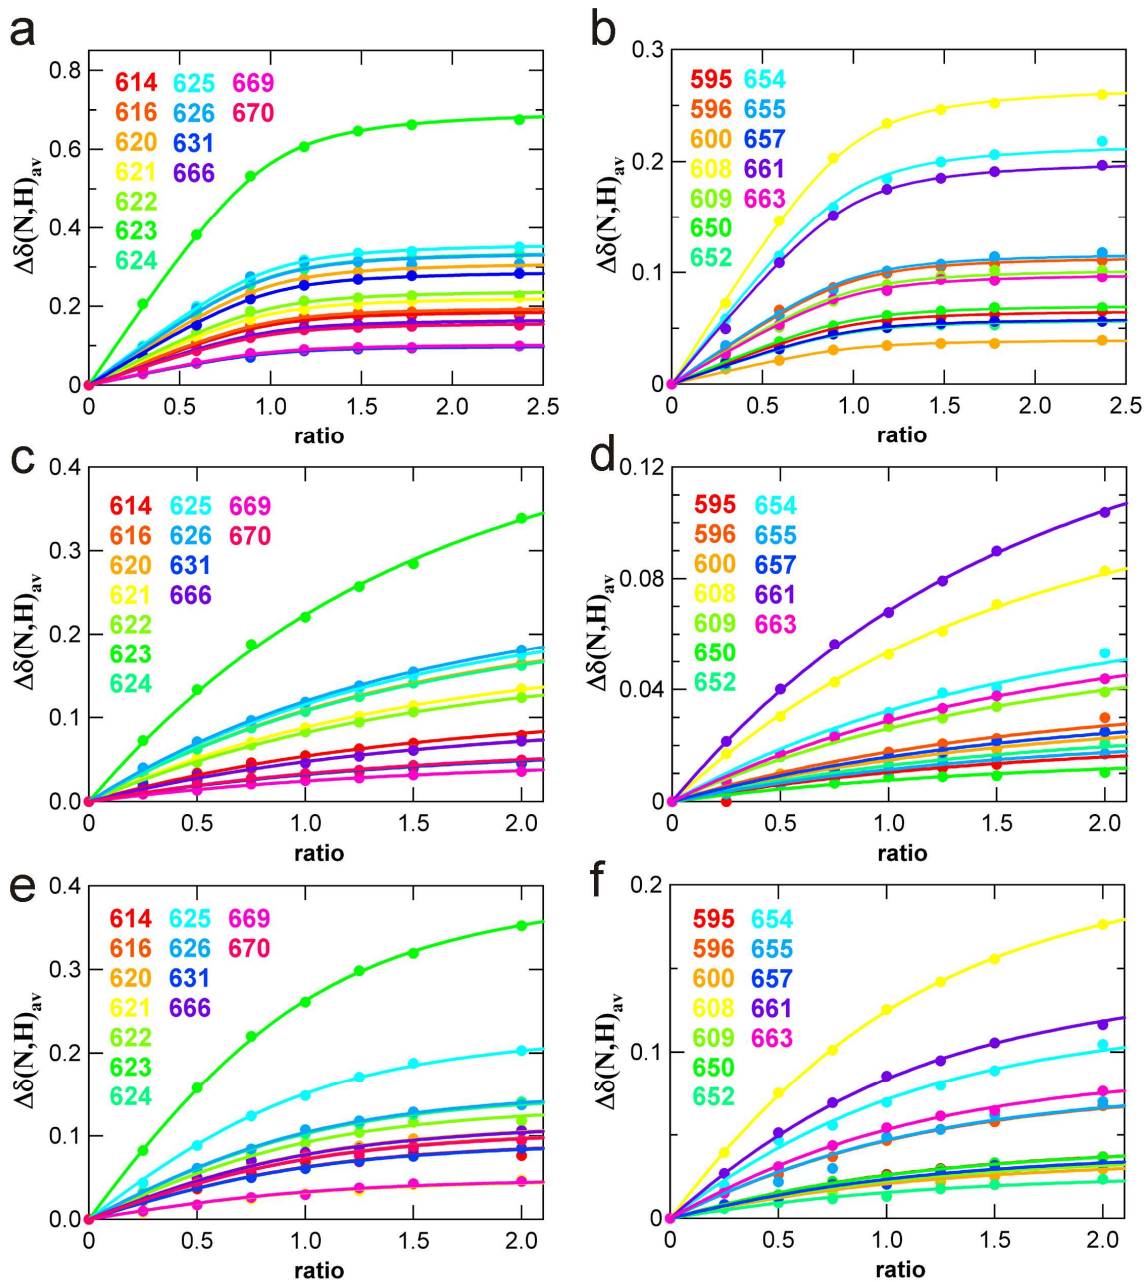

**Supplementary Figure S8.** HSQC titration curves for titration of  $^{15}\text{N}$  labeled KIX with (a, b) p53(13-61), (c,d) the AD1 peptide p53(14-28), and (e,f) the AD2 peptide p53(38-61). Values of  $\Delta\delta(\text{N,H})_{\text{av}}$  are plotted as filled circles and the continuous lines show the curves fitted globally or semi-globally to a one-site binding model. (a, b)  $^{15}\text{N}$  KIX titrations with full-length p53 TAD fitted globally to the curves of all residues. The



curves corresponding to the MLL binding site (residues 614, 616, 620~626, 631, 666, 669, and 670) are shown in (a) and the curves corresponding to the pKID/c-Myb site (residues 595, 596, 600, 608, 609, 650, 652, 654, 655, 657, 661 and 663) in (b). (c)  $^{15}\text{N}$  KIX titrations with AD1 fitted semi-globally for residues located in the MLL binding site. (d)  $^{15}\text{N}$  KIX titrations with AD1 fitted semi-globally for residues located in the pKID/c-Myb binding site. (e)  $^{15}\text{N}$  KIX titrations with AD2 fitted semi-globally for residues in the MLL binding site. (f)  $^{15}\text{N}$  KIX titrations with AD2 fitted semi-globally for residues in the pKID/c-Myb binding site.
